# Supplementary material for: Effect and potential mechanism of oncometabolite succinate promotes distant metastasis of colorectal cancer by activating STAT3
Source: Springer Nature journal article supplement (doi:10.1186/s12876-024-03195-x), 2024-03-14

## HCT 116

We performed this simultaneously in 4 groups(From left to right is: ctrl、Suc、HO+3867、Suc+HO-3867), In order to write the logic of the article, we separately describe in Figure 2 and Figure 3 in the article. Since some of the samples were in close proximity to the gel, we had to crop the bands, and we guarantee that the samples derive from the same experiment and that gels/blots were processed in parallel.

Hct 116  $\beta$ -actin

**Figure4A**

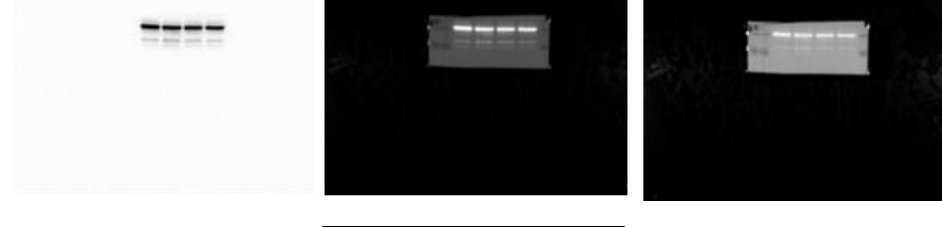

Hct 116  $\beta$ -actin

**Figure2A and Figure3A**

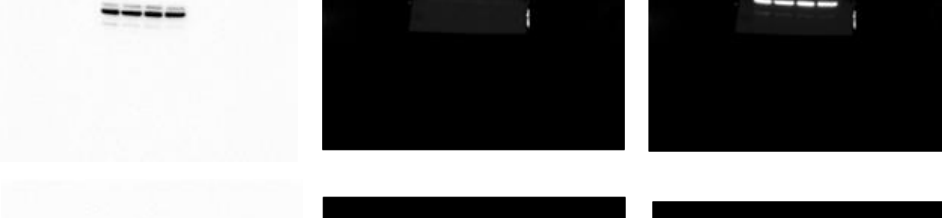

Hct 116  $\beta$ -actin replicates

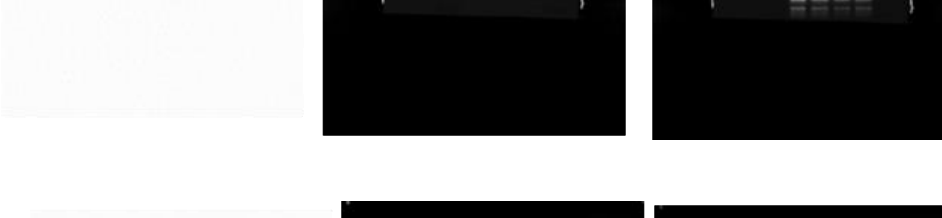

Hct 116 STAT3 replicates

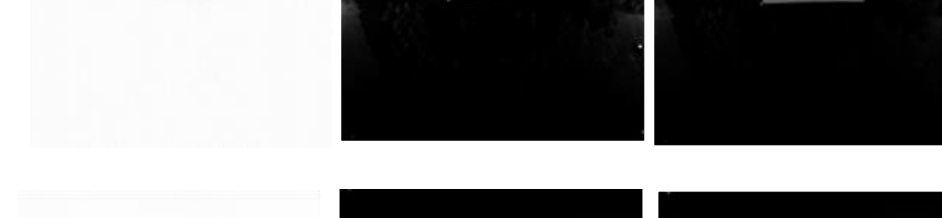

Hct 116 STAT3

**Figure2A and Figure3A**

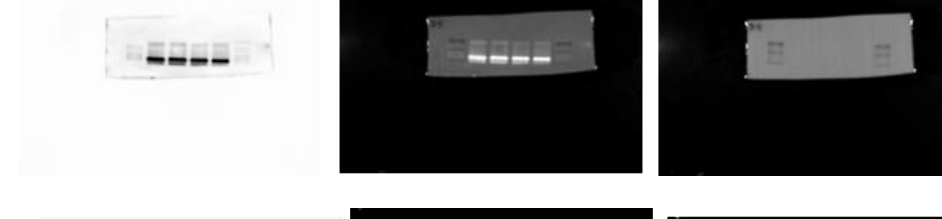

Hct 116 STAT3 replicates

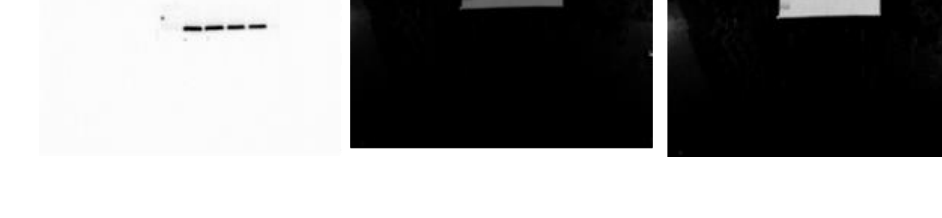

Hct 116 P-STAT3

**Figure3A**

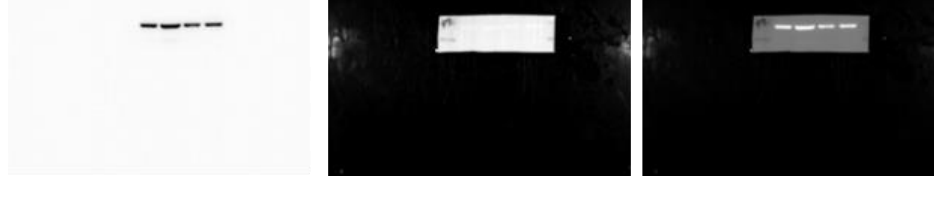

Hct 116 P-STAT3

**Figure2 A**

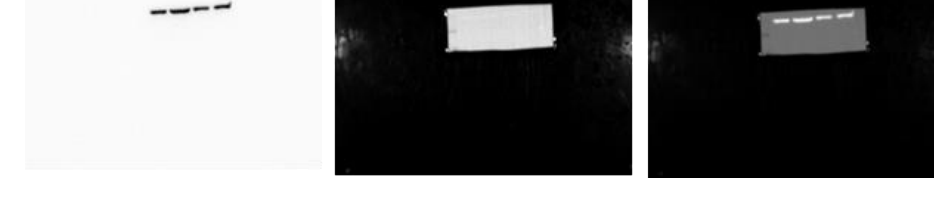

Hct 116 P-STAT3 replicates

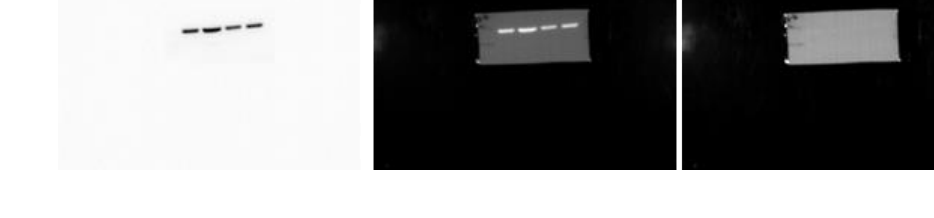

Hct 116 Vimentin

**Figure4A**

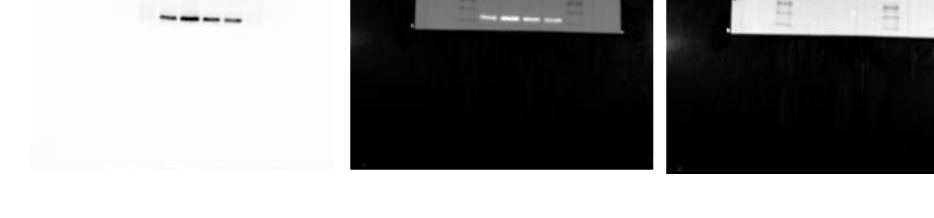

Hct 116 Vimentin replicates

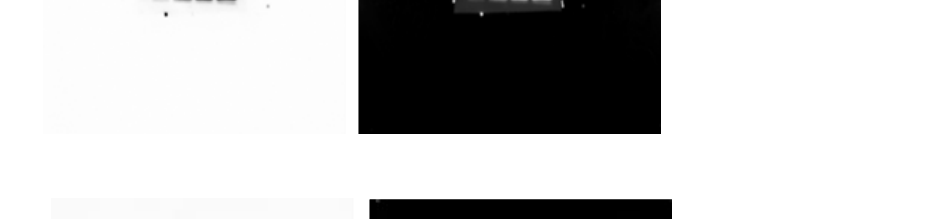

Hct 116 Vimentin replicates

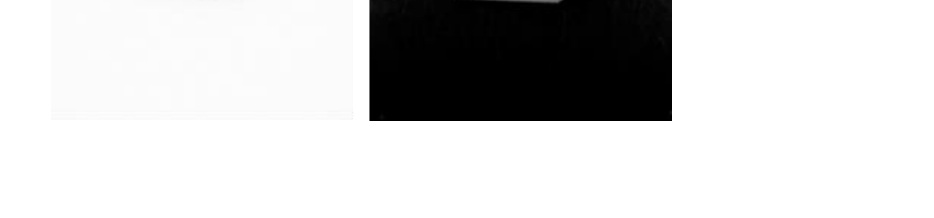

Hct 116 E-cadherin

**Figure4A**

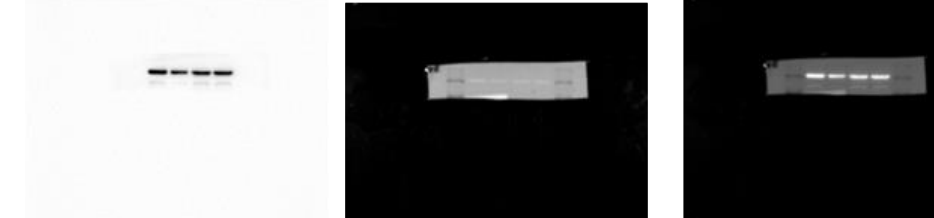

Hct 116 E-cadherin replicates

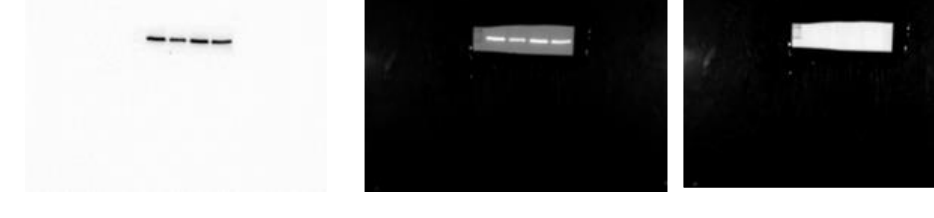

Hct 116 E-cadherin replicates

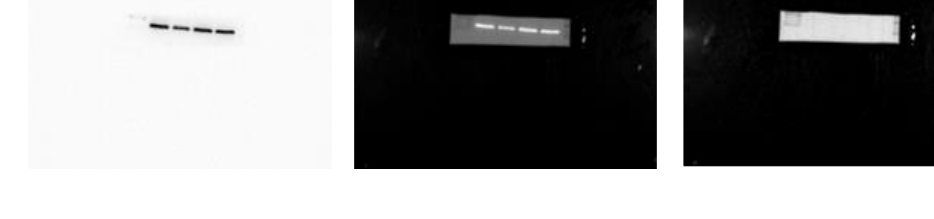

Hct 116 N-cadherin replicates

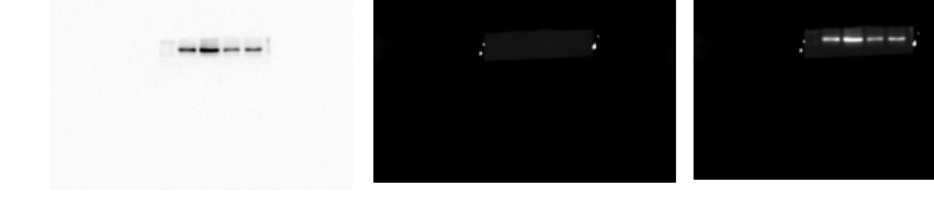

Hct 116 N-cadherin replicates

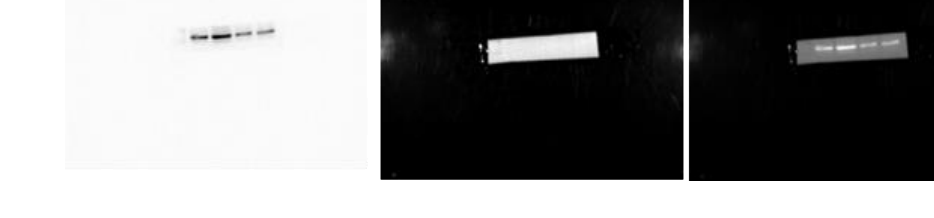

Hct 116 N-cadherin

**Figure4A**

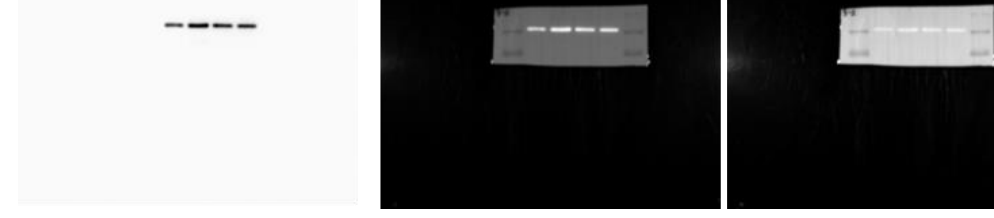

Hct 116 Slug

**Figure4A**

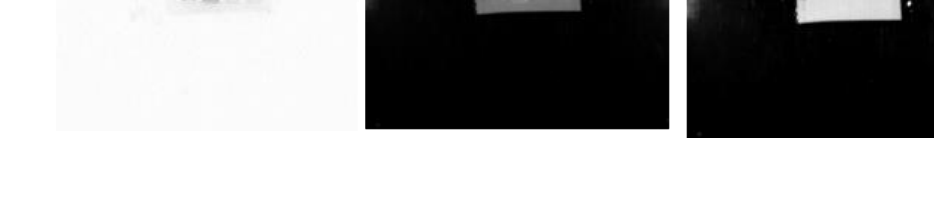

Hct 116 Slug replicates

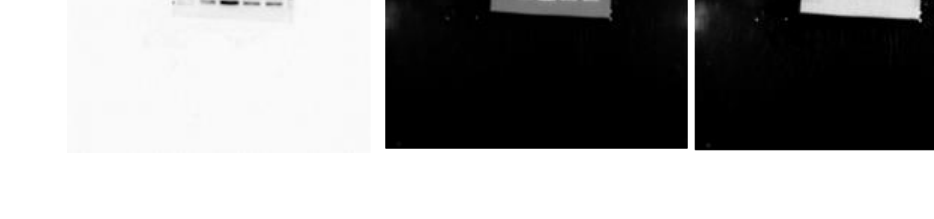

Hct 116 Slug replicates

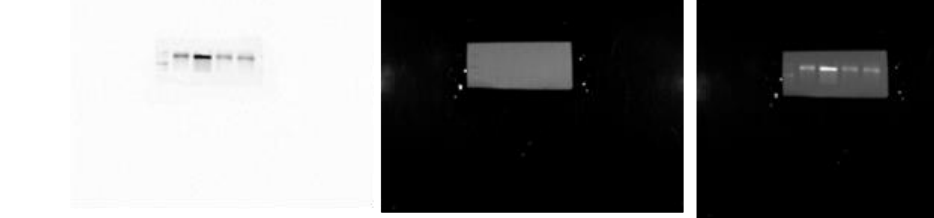

Supplement: MOESM1 [file 26859756]
