# Supplementary material for: Effect and potential mechanism of oncometabolite succinate promotes distant metastasis of colorectal cancer by activating STAT3
Source: Springer Nature journal article supplement (doi:10.1186/s12876-024-03195-x), 2024-03-14

We performed this simultaneously in 4 groups (From left to right is: ctrl, Suc, HO+3867, Suc+HO-3867), In order to write the logic of the article, we separately describe in Figure 2 and Figure 3 in the article. Since some of the samples were in close proximity to the gel, we had to crop the bands, and we guarantee that the samples derive from the same experiment and that gels/blots were processed in parallel.

SW 480  
β -actin  
replicates

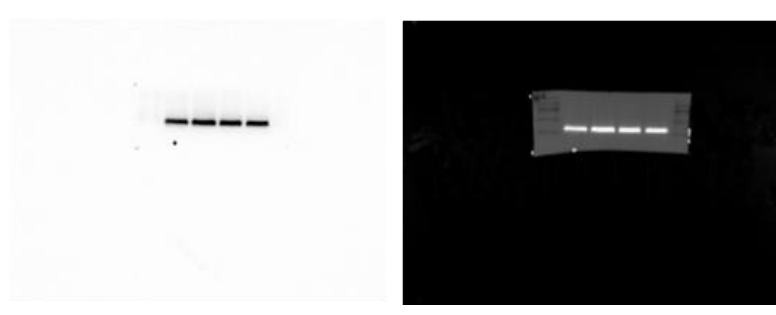

SW 480 β -actin  
Figure4A

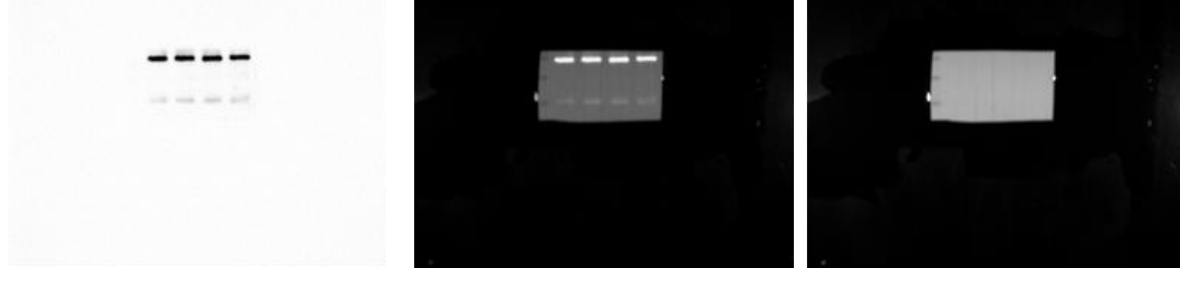

SW 480  
β -actin  
Figure2A  
And  
Figure3A

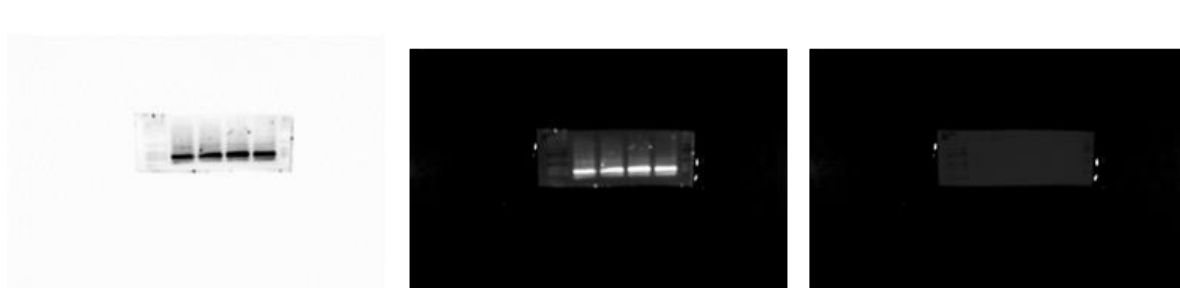

SW 480  
P-STAT3  
replicates

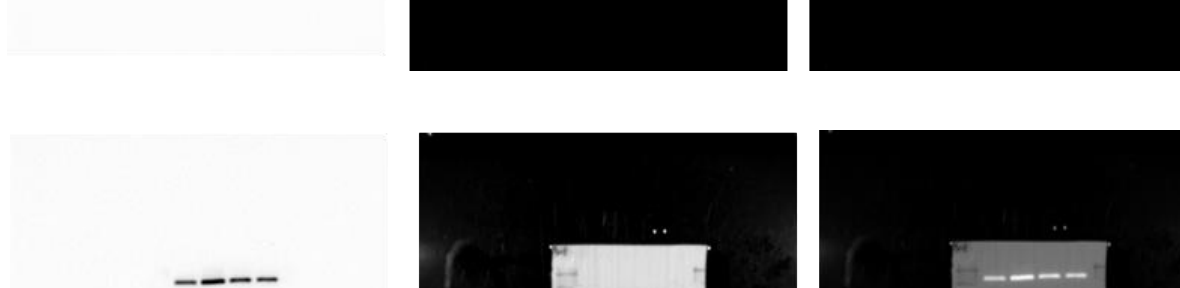

SW 480  
P-STAT3  
Figure2  
and  
Figure3A

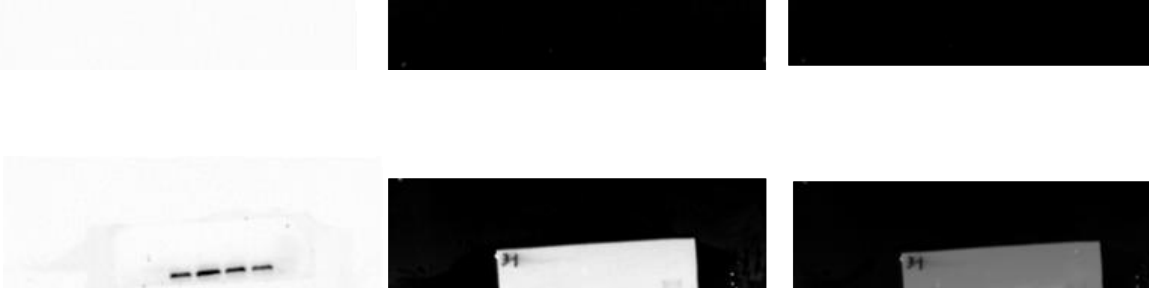

SW 480  
P-STAT3  
replicates

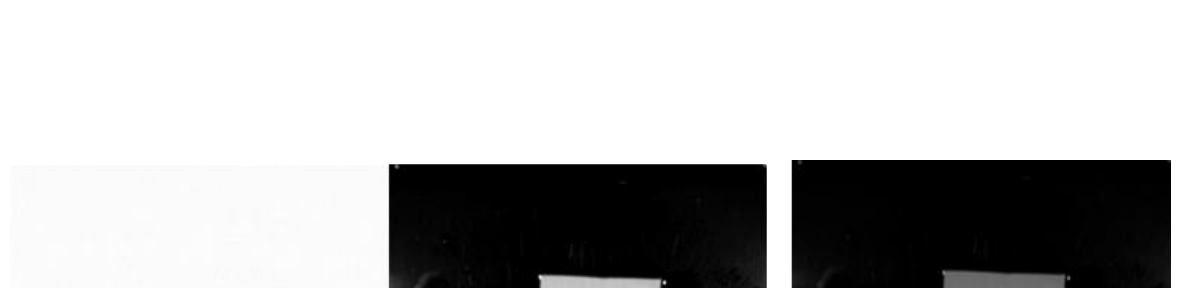

SW 480 STAT3  
replicates

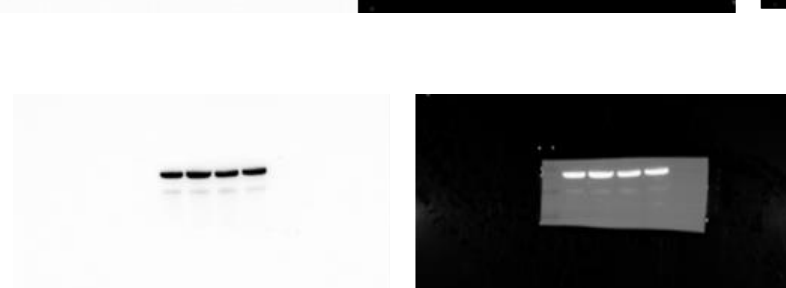

SW 480 STAT3  
Figure2 A a n d  
Figure3A

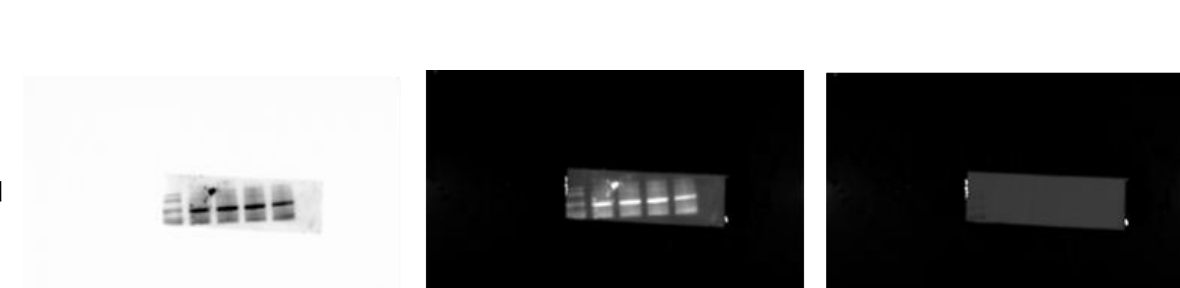

SW 480 STAT3

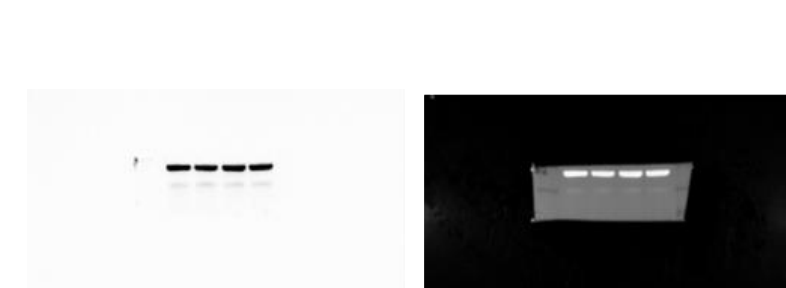

SW 480 slug  
replicates

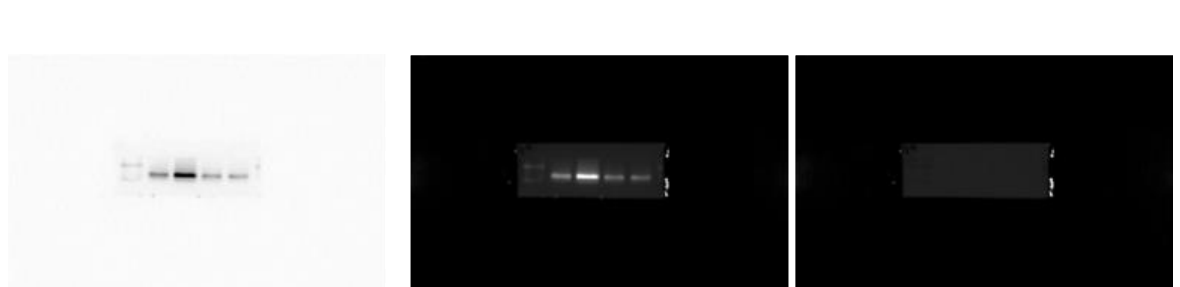

SW 480 slug  
Figure4A

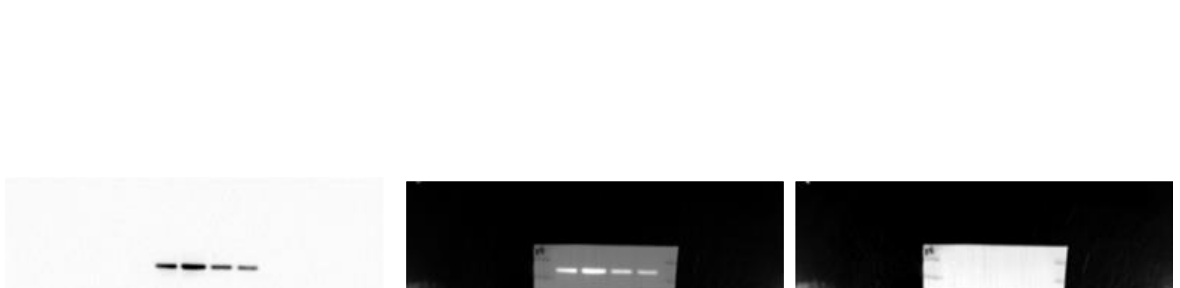

SW 480 slug  
replicates

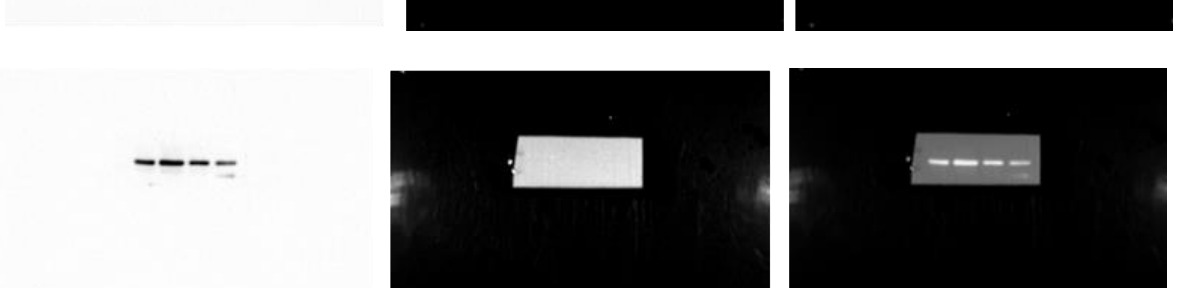

SW 480  
E-cadherin  
Figure4A

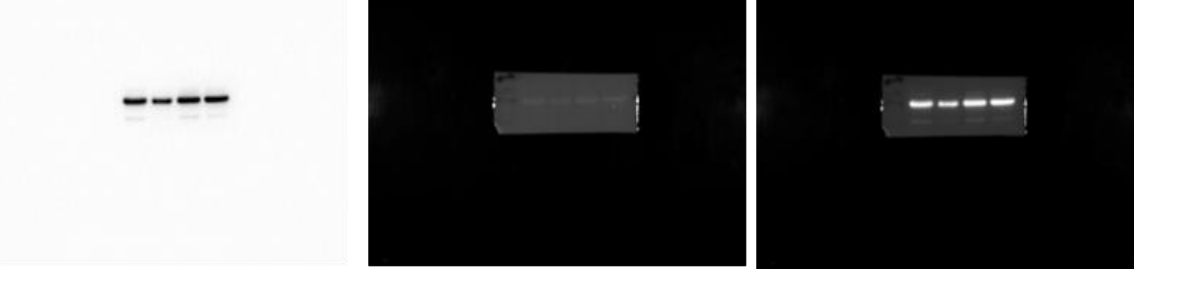

SW 480 E-  
cadherin  
replicates

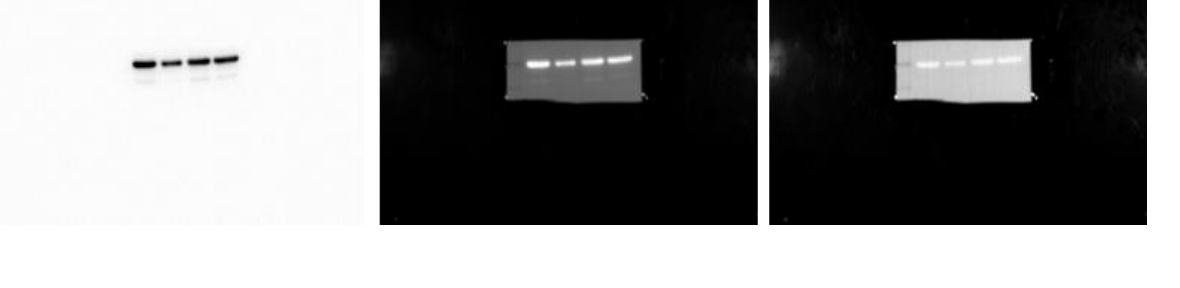

SW 480 E-  
cadherin  
replicates

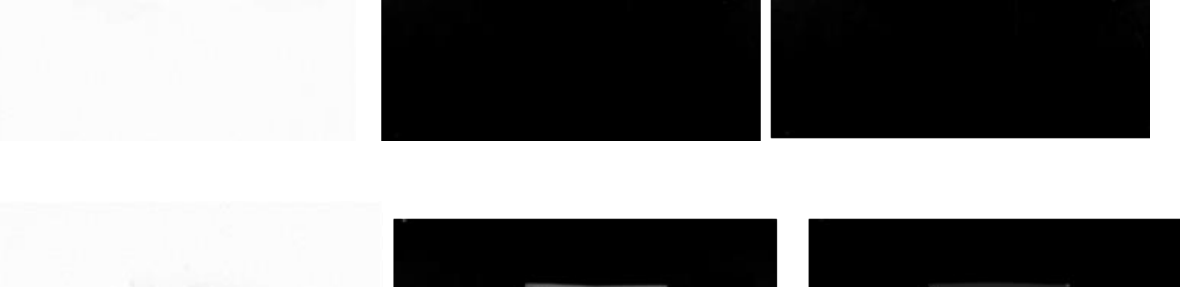

SW 480 Vimentin  
Figure4A

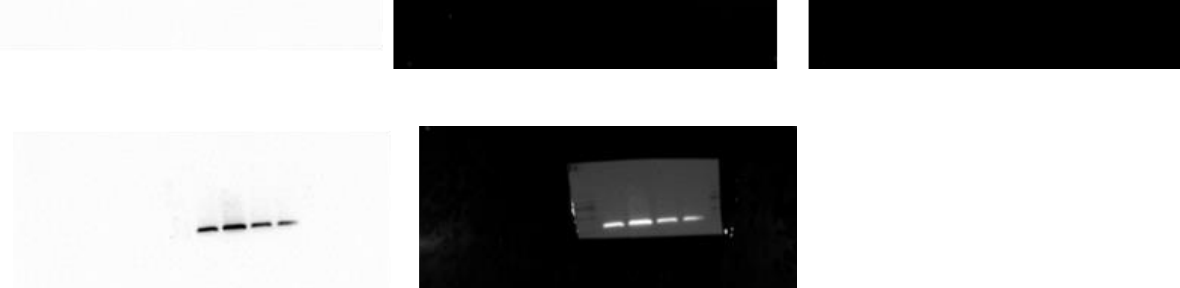

SW 480 Vimentin  
replicates

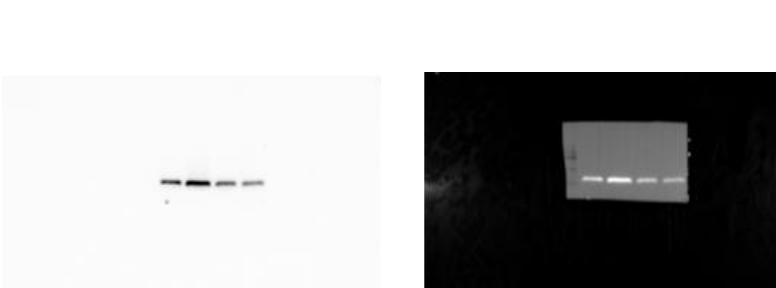

SW 480 Vimentin  
replicates

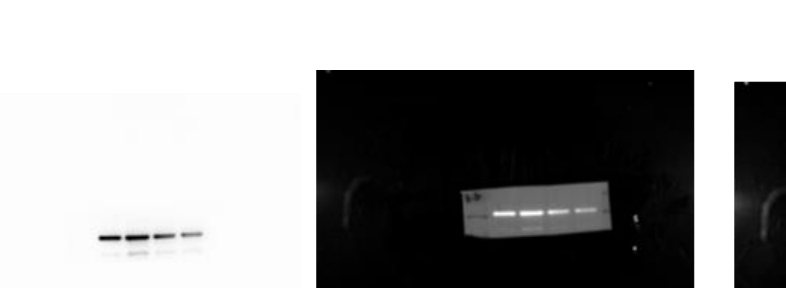

SW 480  
N-cadherin  
replicates

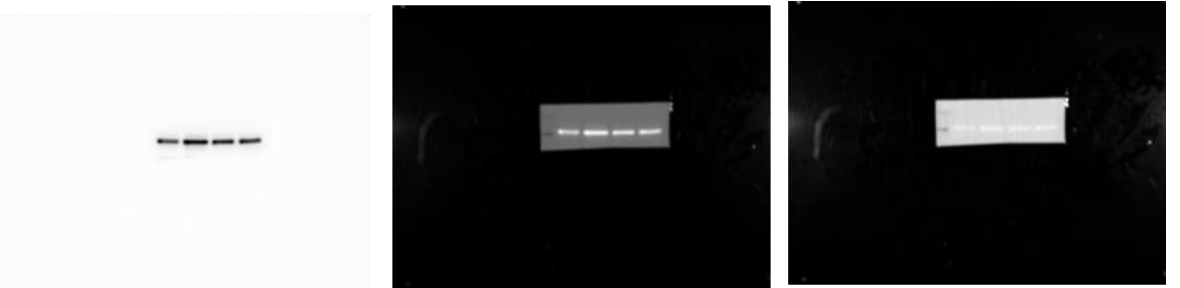

SW 480 N -  
cadherin  
Figure4A

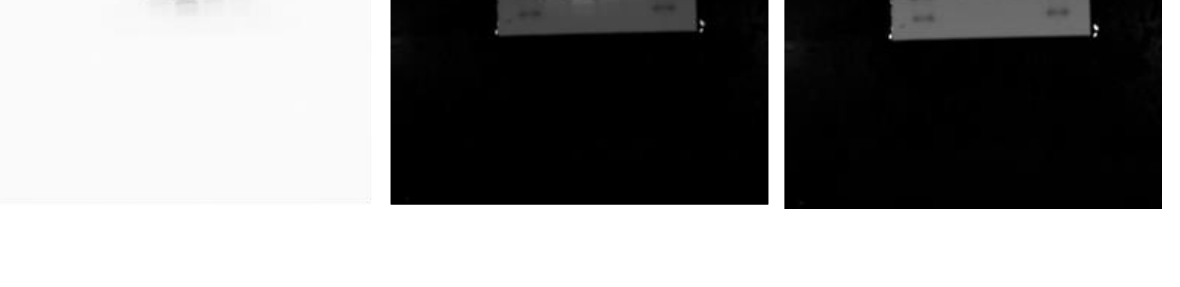

SW 480  
N-cadherin  
replicates

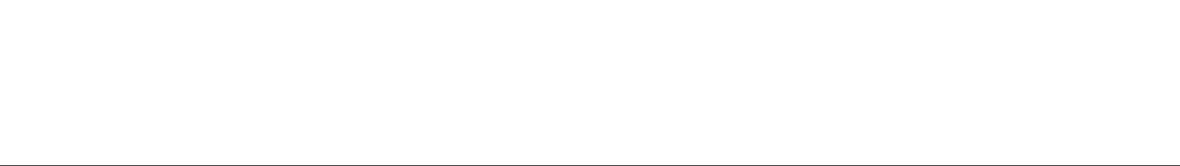

Supplement: MOESM2 [file 26859756]
